# Supplementary material for: The Intracellular Scots Pine Shoot Symbiont Methylobacterium extorquens DSM13060 Aggregates around the Host Nucleus and Encodes Eukaryote-Like Proteins
Source: PubMed Central journal article supplement — mBio. 2015 Mar 24;6(2):e00039-15. doi: 10.1128/mBio.00039-15 (PMC4453540; doi:10.1128/mbio.00039-15), 2015-03-24
Supplement: mbo002152233st1.pdf [file mbo002152233st1.pdf]

**Table S1. Blast-based assignments of gene origins**

| Category                                                                                             | Name | Color in Figure 4   | Criteria                                                                       | Total genes | Chromosome | Mega-plasmid |
|------------------------------------------------------------------------------------------------------|------|---------------------|--------------------------------------------------------------------------------|-------------|------------|--------------|
| <b>DSM1360-specific</b>                                                                              | 1    | red                 |                                                                                |             |            |              |
| Genes unique to DSM13060                                                                             | 1a   | dark red            | m=0,r=0,a=0,n=0<br>AND<br>e=0 AND am1=0                                        | 510         | 394        | 116          |
| Potential transfer from non- <i>Alphaproteobacteria</i> to DSM13060                                  | 1b   | intermediate red    | m=0,r=0,a=0,n>0<br>AND e=0<br>AND am1=0<br>m=0,n>r,n>a<br>AND e=0<br>AND am1=0 | 71          | 59         | 12           |
| Potential transfer from non- <i>Rhizobiales Alphaproteobacteria</i> to DSM13060                      | 1c   | light red           | m=0,r=0,a>0,n>0<br>AND e=0<br>AND am1=0                                        | 33          | 26         | 7            |
| <b><i>M. extorquens</i>-specific</b>                                                                 | 2    | purple              |                                                                                |             |            |              |
| Genes unique to DSM13060/AM1                                                                         | 2a   | dark purple         | m=0,r=0,a=0,n=0<br>AND am1>=1                                                  | 731         | 284        | 447          |
| Genes unique to <i>extorquens</i> , not shared with AM1                                              | 2b   | purple              | m=0,r=0,a=0,n=0<br>AND e>0<br>AND am1 =0                                       | 80          | 57         | 23           |
| Potential transfer from non- <i>Alphaproteobacteria</i> to DSM13060/AM1                              | 2c   | intermediate purple | m=0,r=0,a=0,n>0<br>AND am1>=0<br>m=0,n>r,n>a<br>AND am1>=0                     | 294         | 153        | 141          |
| Potential transfer from non- <i>Alphaproteobacteria</i> to <i>extorquens</i> , not shared with AM1   | 2d   | light purple        | m=0,r=0,a=0,n>0<br>AND e>0<br>AND am1=0<br>m=0,n>r,n>a<br>AND e>0<br>AND am1=0 | 29          | 25         | 4            |
| <b><i>Methylobacterium</i>-specific</b>                                                              | 3    | blue                |                                                                                |             |            |              |
| Genes unique to <i>Methylobacterium</i> shared with AM1                                              | 3a   | dark blue           | m>0,r=0,a=0,n=0<br>AND am1 >=1                                                 | 978         | 926        | 52           |
| Genes unique to <i>Methylobacterium</i> , not shared with AM1                                        | 3b   | blue                | m>0,r=0,a=0,n=0<br>AND am1 =0<br>AND e>0                                       | 62          | 44         | 18           |
| Potential transfer from non- <i>Alphaproteobacteria</i> to <i>Methylobacterium</i> , shared with AM1 | 3c   | intermediate blue   | m>0,r=0,a=0,n>0<br>AND am1>=1<br>m>0, n>r,n>a<br>AND am1>=1                    | 166         | 152        | 14           |

|                                                                                                          |    |             |                                                                                 |      |      |     |
|----------------------------------------------------------------------------------------------------------|----|-------------|---------------------------------------------------------------------------------|------|------|-----|
| Potential transfer from non- <i>Alphaproteobacteria</i> to <i>Methylobacterium</i> , not shared with AM1 | 3d | light blue  | m>0,r=0,a=0,n>0<br>AND am1=0<br>AND e>0<br>m>0, n>r,n>a<br>AND am1=0<br>AND e>0 | 32   | 20   | 12  |
| <b>Alpha backbone</b>                                                                                    |    | green       |                                                                                 |      |      |     |
| Alpha backbone, shared with AM1                                                                          |    | dark green  | Remaining, am1>1                                                                | 3034 | 2738 | 219 |
| Alpha backbone, not shared with AM1                                                                      |    | light green | Remaining, am1 = 0                                                              | 625  | 484  | 123 |
| HGT from non- <i>Alphaproteobacteria</i> to DSM1360 or a <i>Methylobacterium</i> ancestor, total         |    |             | 1b,2c-d, 3c-d                                                                   | 592  | 409  | 183 |
