# Supplementary material for: The Intracellular Scots Pine Shoot Symbiont Methylobacterium extorquens DSM13060 Aggregates around the Host Nucleus and Encodes Eukaryote-Like Proteins
Source: PubMed Central journal article supplement — mBio. 2015 Mar 24;6(2):e00039-15. doi: 10.1128/mBio.00039-15 (PMC4453540; doi:10.1128/mbio.00039-15), 2015-03-24
Supplement: mbo002152233st2.pdf [file mbo002152233st2.pdf]

**Table S2. Strains, plasmids and primers used in study**

| Strain, plasmid or primer                           | Description                                                                                                                                                 | Reference or source             |
|-----------------------------------------------------|-------------------------------------------------------------------------------------------------------------------------------------------------------------|---------------------------------|
| <b><i>Escherichia coli</i></b>                      |                                                                                                                                                             |                                 |
| DH5α                                                | <i>endA1 gyrSA96 hrdR17 (rK-mK-) supE44 recA1</i> ; general host strain used for transformation and propagation of plasmids                                 | Boyer & Roulland-Dussoix (1969) |
| <b><i>Methylobacterium extorquens</i></b>           |                                                                                                                                                             |                                 |
| DSM13060                                            | Wild type; a plant growth-promoting conifer endophyte                                                                                                       | Pirttilä et al. 2000            |
| 13061                                               | DSM13060 containing mTn5 <i>gusA-pgfp21-Km<sup>r</sup></i> cassette (pFAJ1820)                                                                              | Pohjanen et al. 2014            |
| 13062                                               | 13061 containing mTn5 <i>gusA-pgfp21-Km<sup>r</sup></i> cassette and pMP7604 containing mCherry gene under the control of the tac promoter, Tc <sup>r</sup> | This study                      |
| <b>Plasmids</b>                                     |                                                                                                                                                             |                                 |
| pJET 1.2                                            | Cloning vector for amplified PCR products; Ap <sup>r</sup>                                                                                                  | Thermo Fisher Scientific        |
| pME6031                                             | Broad host-range cloning vector which is maintained in Gram-negative bacteria without selection pressure, Tc <sup>r</sup>                                   | Heeb et al. 2000                |
| pMP7604                                             | pMP6031 derivative harboring mCherry gene under the control of the tac promoter, Tc <sup>r</sup>                                                            | Lagendijk et al. 2010           |
| pMExt054                                            | pMP7604 pME6031 derivative harboring <i>mCherry</i> gene under control of <i>M.extorquens</i> DSM13060 <i>acdS</i> promoter                                 | This study                      |
| pMExt870                                            | pMP7604 pME6031 derivative harboring <i>mCherry</i> gene under control of <i>M.extorquens</i> DSM13060 <i>cobS</i> promoter                                 | This study                      |
| pMExt599                                            | pME6031 derivative harboring <i>mCherry</i> gene under control of <i>M. extorquens</i> DSM13060 <i>bphP</i> promoter                                        | This study                      |
| <b>Primers</b>                                      |                                                                                                                                                             |                                 |
| Gene                                                | Sequence                                                                                                                                                    | Name, restriction site*         |
| <i>acdS</i>                                         | TTAT <u>ACGCGT</u> AGCATCCTCCCGAAAGGCGGT                                                                                                                    | acdSprom-F, <i>MluI</i>         |
| <i>acdS</i>                                         | GGAATTCATATGCGATCGCCTTCGTGTGCGTC                                                                                                                            | acdSprom-R, <i>NdeI</i>         |
| <i>cobS</i>                                         | TTAT <u>ACGCGT</u> CATTCATCGGCAGGGCTCGTGC                                                                                                                   | cobSprom-F, <i>MluI</i>         |
| <i>cobS</i>                                         | GGAATTCATATG <u>TCCGCTGCCCTTCCCTTCG</u>                                                                                                                     | cobSprom-R, <i>NdeI</i>         |
| <i>bphP</i>                                         | TTAT <u>ACGCGT</u> AACCATCGCGCGCCGGG                                                                                                                        | bphPprom-F, <i>MluI</i>         |
| <i>bphP</i>                                         | GGAATTCATATG <u>TACGGCAGCCGGTATGCCTGC</u>                                                                                                                   | bphPprom-R, <i>NdeI</i>         |
| <i>mCherry</i>                                      | GGAATTCATATG <u>GTGAGCAAGGGCGAGGA</u>                                                                                                                       | mCherry-F, <i>NdeI</i>          |
| <i>mCherry</i>                                      | TTAT <u>GGTACC</u> TTACTTGTACAGCTCGTCCATGCC                                                                                                                 | mCherry-R1, <i>KpnI</i>         |
| <i>For sequencing constructs in plasmid pME6031</i> |                                                                                                                                                             |                                 |
| pME6031                                             | CGTGATCGAAATCCAGATCC                                                                                                                                        | pME6031-seq-F                   |
| pME6031                                             | C GACTGAATCCGGTGAGAAT                                                                                                                                       | pME6031-seq-R                   |

\* Restriction sites are underlined
