# Supplementary figures and images for: The Intracellular Scots Pine Shoot Symbiont Methylobacterium extorquens DSM13060 Aggregates around the Host Nucleus and Encodes Eukaryote-Like Proteins
Source: PubMed Central journal article supplement — mBio. 2015 Mar 24;6(2):e00039-15. doi: 10.1128/mBio.00039-15 (PMC4453540; doi:10.1128/mbio.00039-15), 2015-03-24

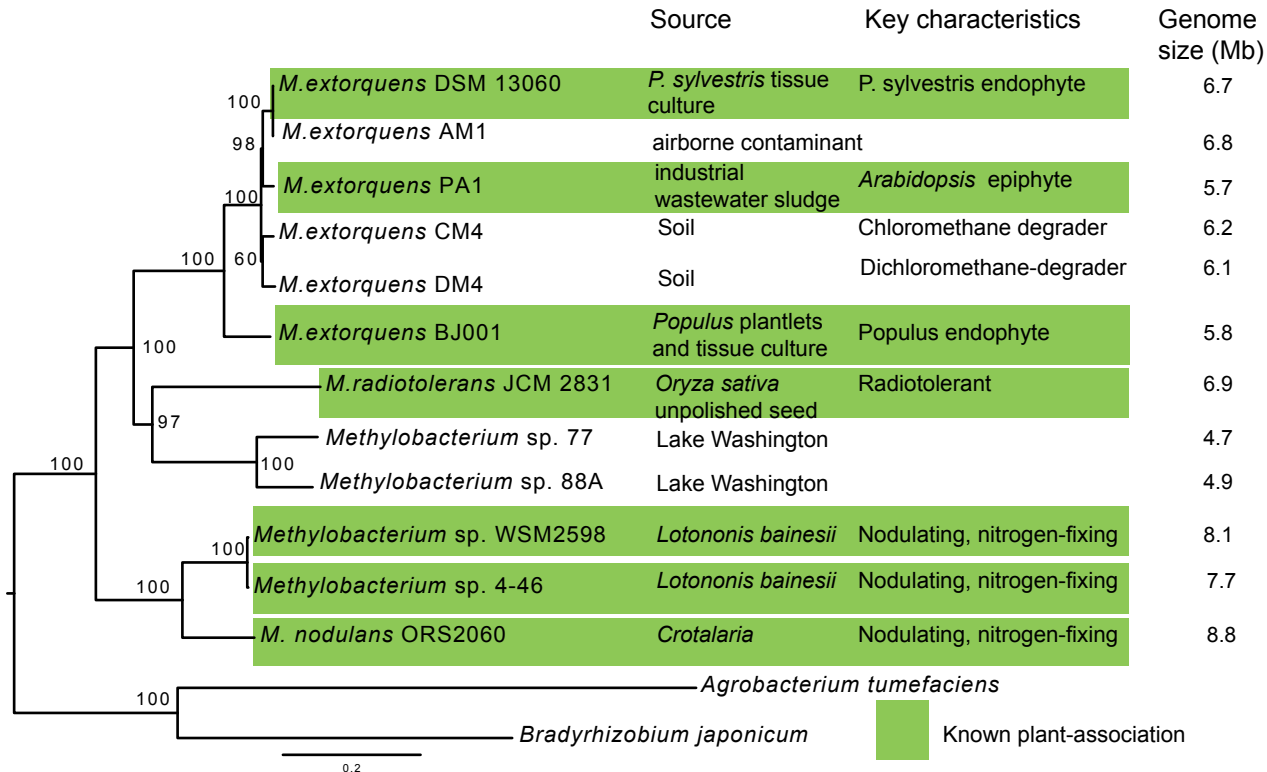

Supplement: mbo002152233sf1.pdf [file mbo002152233sf1.pdf]

A

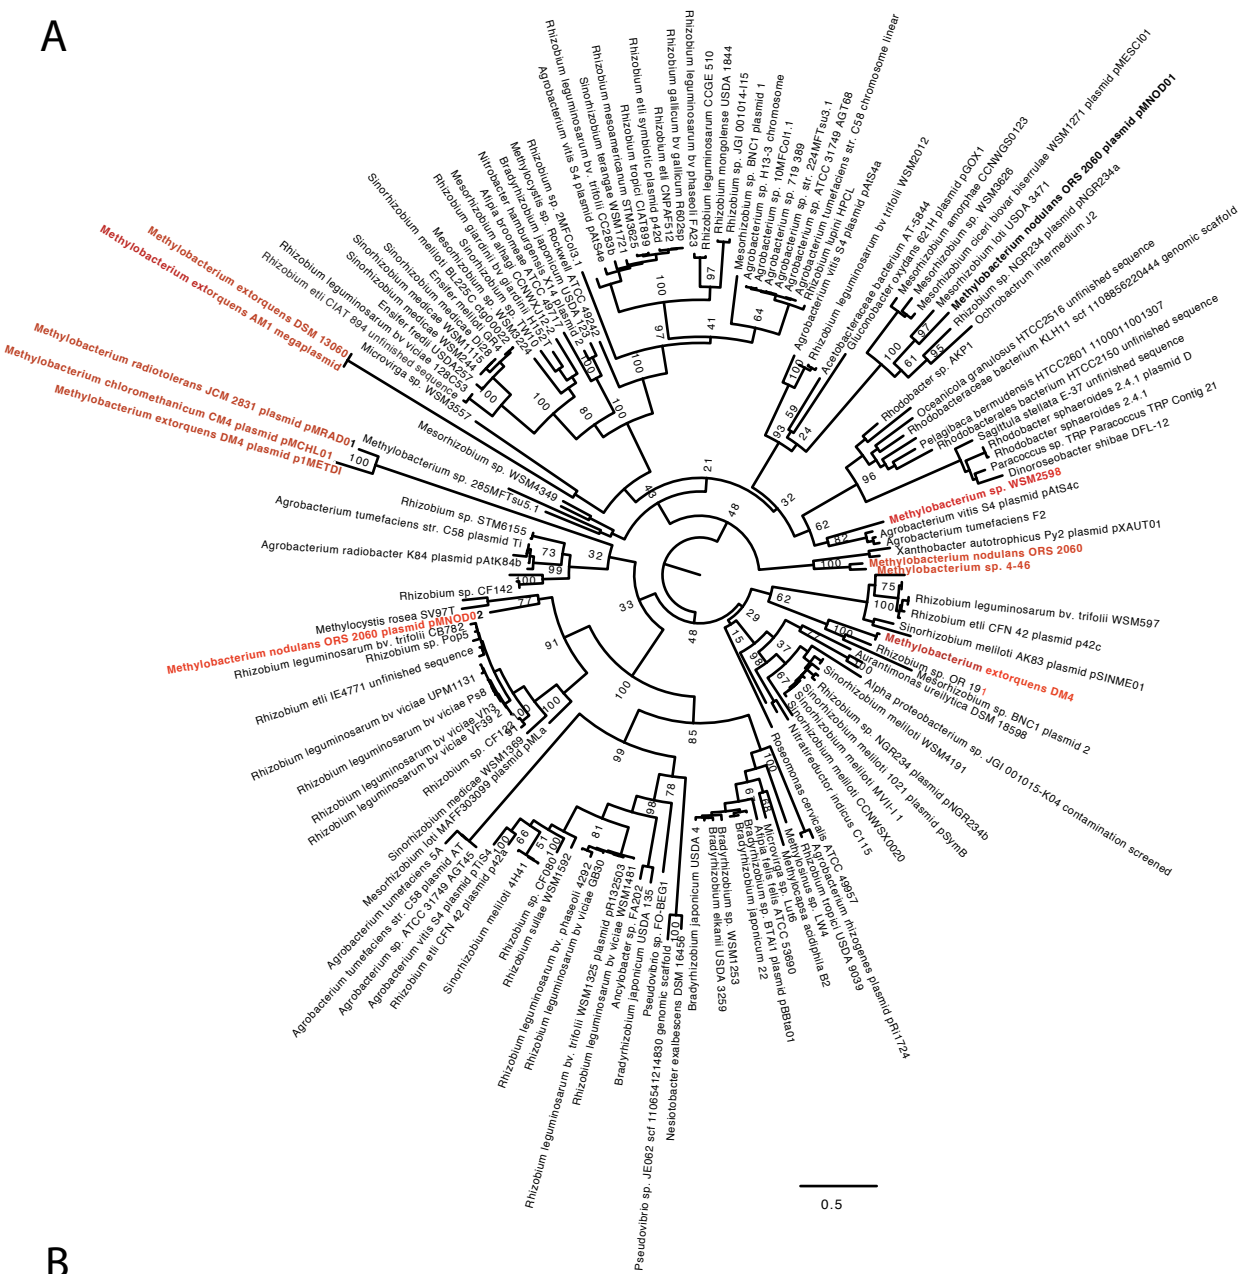

B

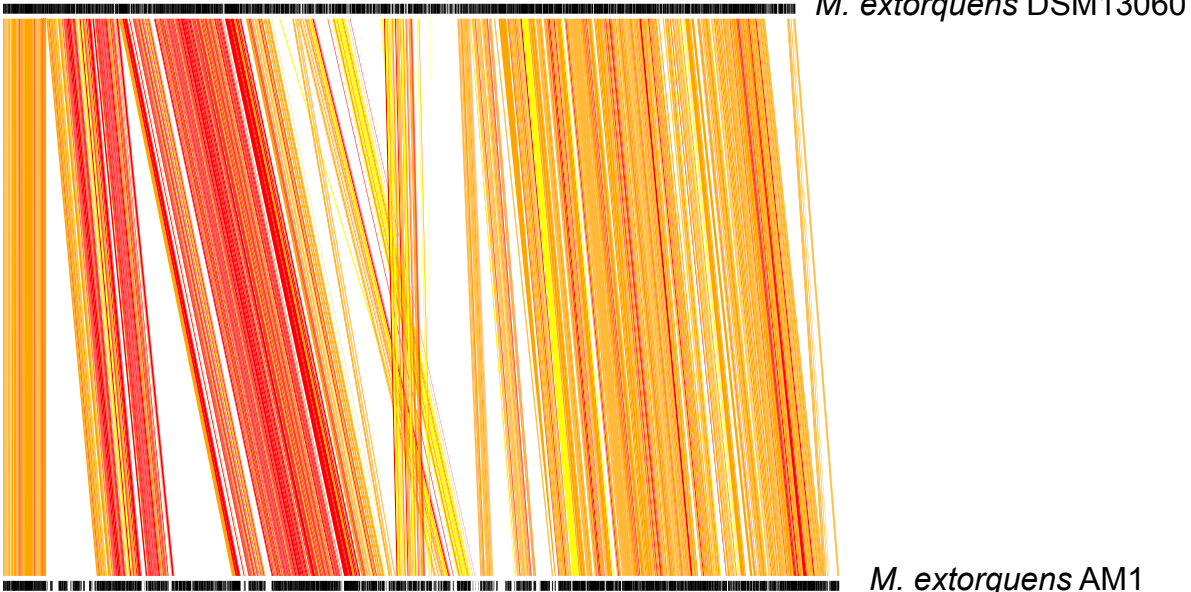

Supplement: mbo002152233sf2.pdf [file mbo002152233sf2.pdf]

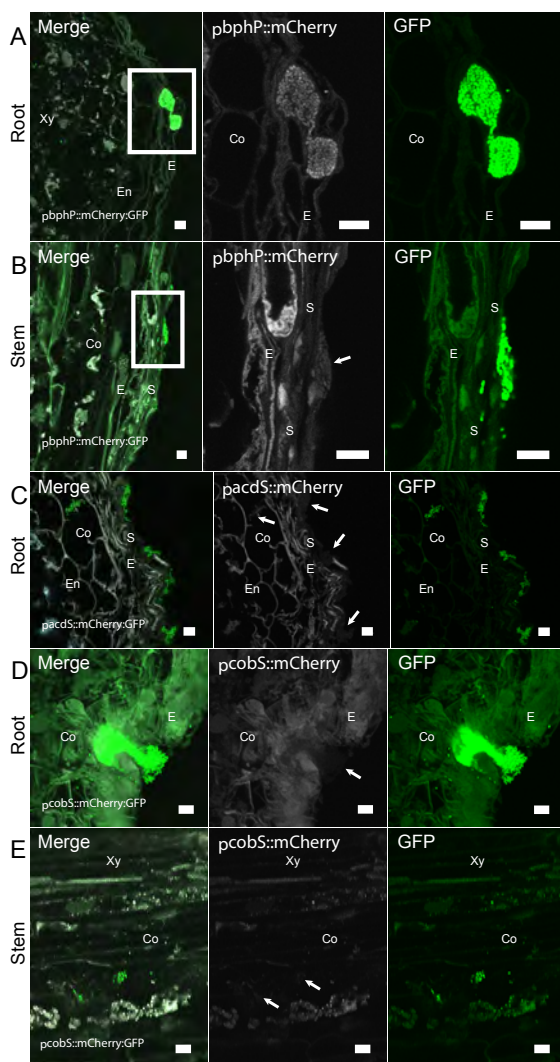

Supplement: mbo002152233sf3.pdf [file mbo002152233sf3.pdf]

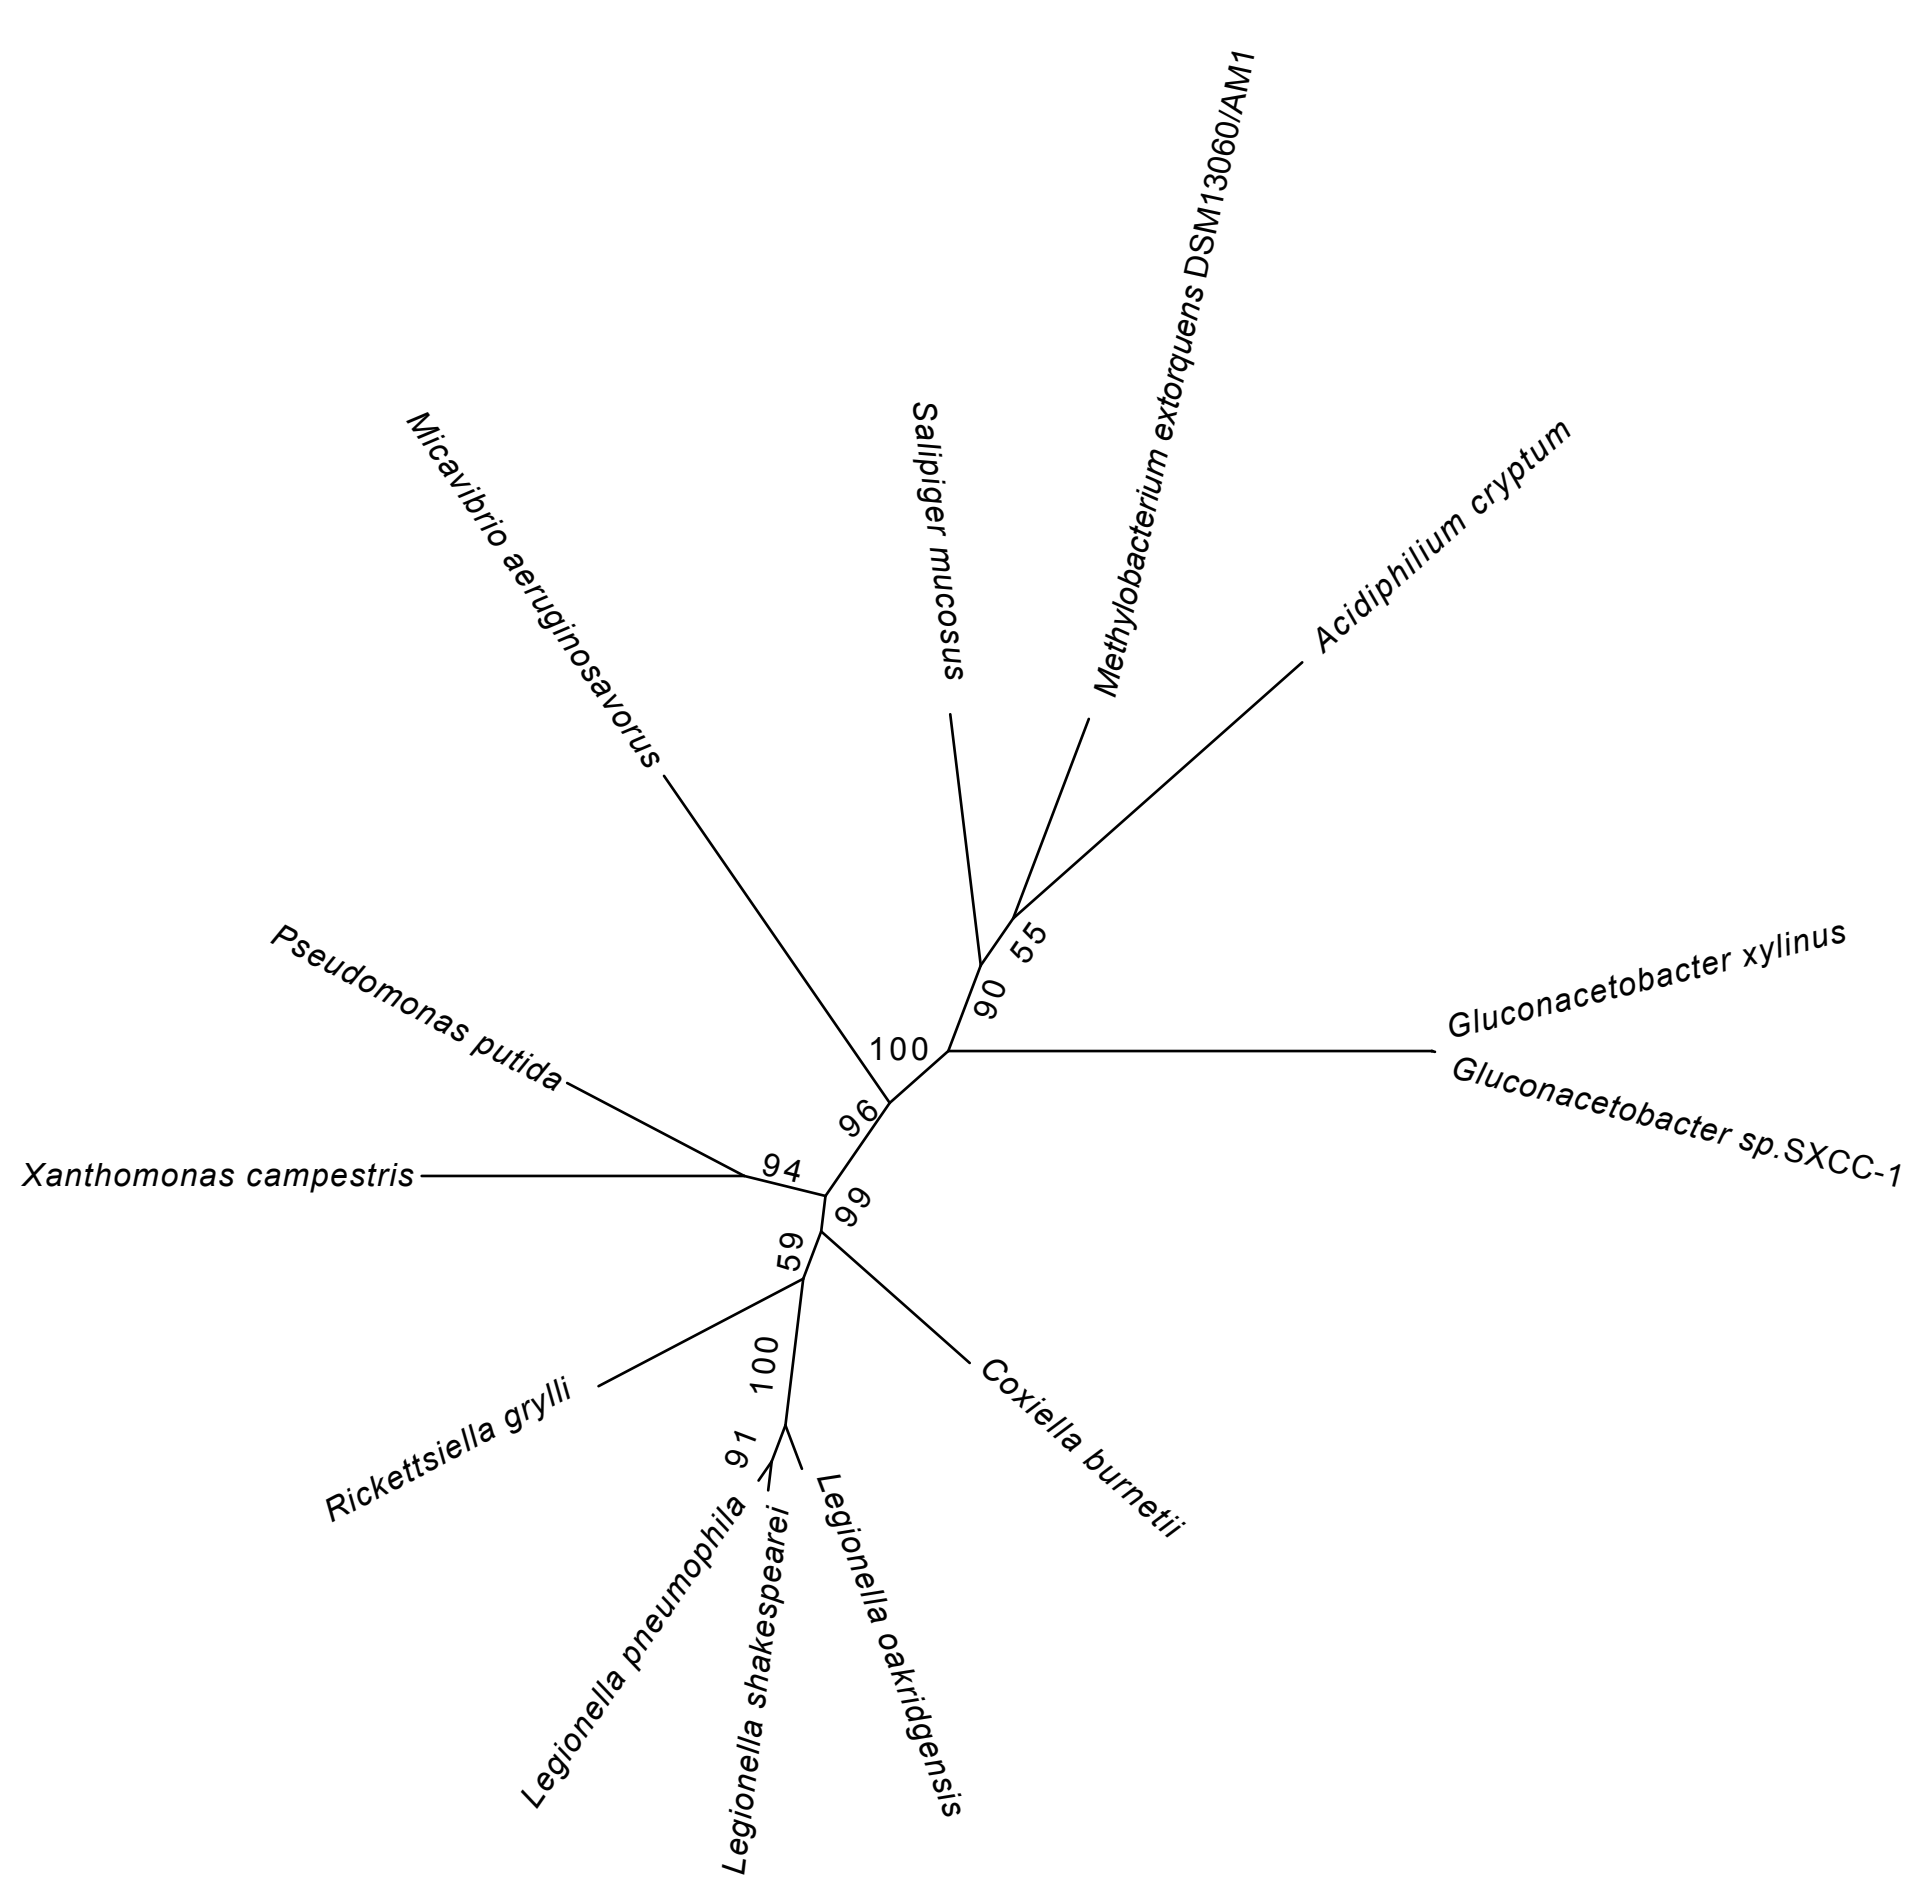

Supplement: mbo002152233sf4.pdf [file mbo002152233sf4.pdf]
